# Supplementary material for: Alcohol Consumption and Type 2 Diabetes
Source: Oxford University Press journal article supplement (doi:10.2337/db07-0181), 2007-08-28
Supplement: db070181onlineappendix.doc [file db070181onlineappendix.doc]

**Supplementary table for on-line publication: Lifestyle characteristics among *ADH1C*1* homozygotes, heterozygotes and *ADH1C*2* homozygotes in the Nurses’ Health Study and Health Professional Follow-up Study.**

|  | **Women** | | | | **Men** | | | |
| --- | --- | --- | --- | --- | --- | --- | --- | --- |
|  | **ADH1C*1*1** | **ADH1C*1*2** | **ADH1C*2*2** | **P-value** | **ADH1C*1*1** | **ADH1C*1*2** | **ADH1C*2*2** | **P-value** |
| n |  |  |  |  | 270 | 373 | 122 |  |
| Age (years) | 56.9 | 57.1 | 56.6 | 0.63 | 60.4 | 60.3 | 61.4 | 0.41 |
| BMI (kg/m2) | 28.8 | 28.2 | 28.8 | 0.13 | 27.5 | 27.4 | 27.4 | 0.92 |
| Physical activity (Mets/week) | 13.3 | 14.8 | 13.4 | 0.20 | 31.0 | 32.6 | 31.0 | 0.80 |
| Smoking (%) |  |  |  |  |  |  |  |  |
| Never | 45.0 | 46.8 | 40.7 | 0.18 | 49.3 | 39.4 | 45.1 | 0.14 |
| Past | 44.4 | 40.8 | 45.9 |  | 47.4 | 54.2 | 50.8 |  |
| Current | 10.6 | 12.4 | 13.4 |  | 3.0 | 5.1 | 4.1 |  |
| Family history of diabetes (%) | 32.3 | 28.8 | 31.0 | 0.37 | 19.6 | 23.1 | 21.3 | 0.58 |
| Menopausal status (%) | 81.4 | 80.6 | 78.6 | 0.61 | - | - | - | - |
| Nutrients*: |  |  |  |  |  |  |  |  |
| Energy (kcal) | 1795 | 1798 | 1810 | 0.93 | 2105 | 2149 | 2143 | 0.70 |
| Saturated fatty acids (g) | 21.9 | 21.4 | 22.3 | 0.27 | 22.2 | 23.1 | 23.5 | 0.10 |
| Trans fatty acids (g) | 3.2 | 3.1 | 3.2 | 0.62 | 2.9 | 3.1 | 3.3 | 0.06 |
| Polyunsaturated fatty acids (g) | 12.1 | 12.0 | 12.0 | 0.95 | 12.0 | 12.5 | 12.5 | 0.19 |
| Fiber (g) | 19.8 | 20.1 | 19.9 | 0.76 | 22.6 | 21.4 | 21.6 | 0.10 |
| Glycemic load | 118.0 | 120.4 | 117.6 | 0.51 | 135.4 | 130.9 | 131.5 | 0.11 |
| Coffee consumption (cups/day) | 2.1 | 2.2 | 2.1 | 0.80 | 2.0 | 2.1 | 1.9 | 0.77 |

*****All nutrients are energy-adjusted except energy.
